# Supplementary material for: Synergistic photovoltaic–thermoelectric effect in a nanostructured CdTe/Bi2Te3 heterojunction for hybrid energy harvesting
Source: Royal Society of Chemistry journal article supplement (doi:10.1039/c6ra20149k), 2016-01-01
Supplement: c6ra20149k1.pdf [file c6ra20149k1.pdf]

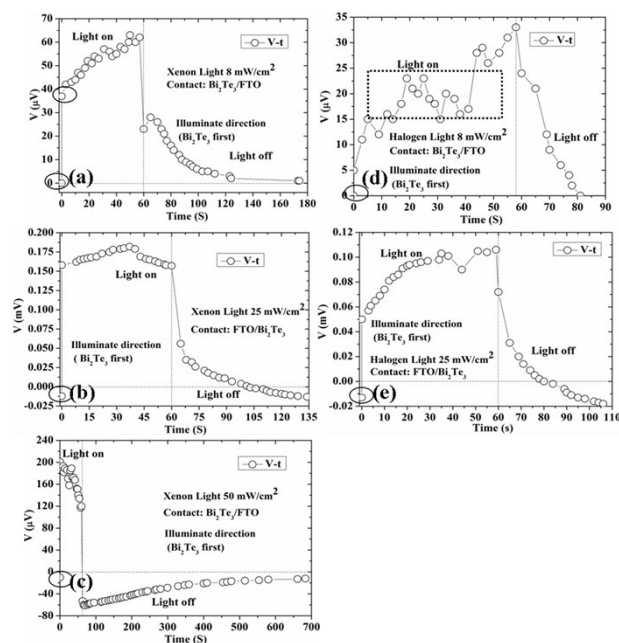

**Fig. S1** Voltage change as a function of time ( $V-t$  plots) for  $\text{CdTe}/\text{Bi}_2\text{Te}_3$  single cell illuminated using xenon light source at (a)  $8 \text{ mW/cm}^2$ ; (b)  $25 \text{ mW/cm}^2$ ; (c)  $50 \text{ mW/cm}^2$ ; and using halogen light source at (d)  $8 \text{ mW/cm}^2$ ; (e)  $25 \text{ mW/cm}^2$ . The light was turned on at 0 s and turned off at approximately 60 s. The first point is the background voltage generated by ambient light. The device was illuminated from the  $\text{Bi}_2\text{Te}_3$  side.

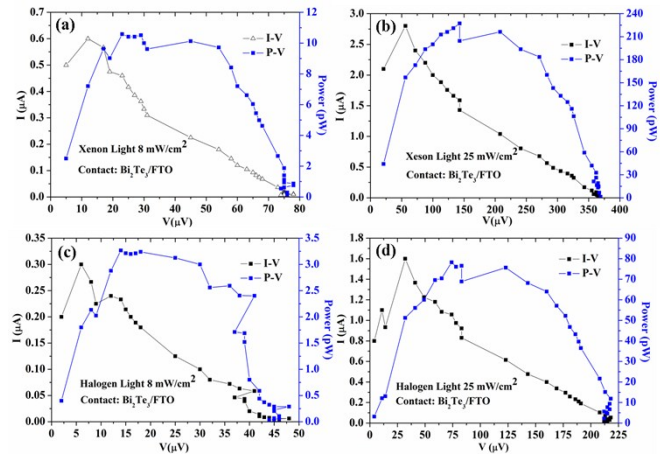

**Fig. S2** (a) I-V and P-V curve of CdTe/Bi<sub>2</sub>Te<sub>3</sub> single cell illuminated using xenon light source at (a) 8 mW/cm<sup>2</sup>; (b) 25 mW/cm<sup>2</sup>; and using halogen light source at (d) 8 mW/cm<sup>2</sup>; (e) 25 mW/cm<sup>2</sup>. The device was illuminated from the conductive substrate side.

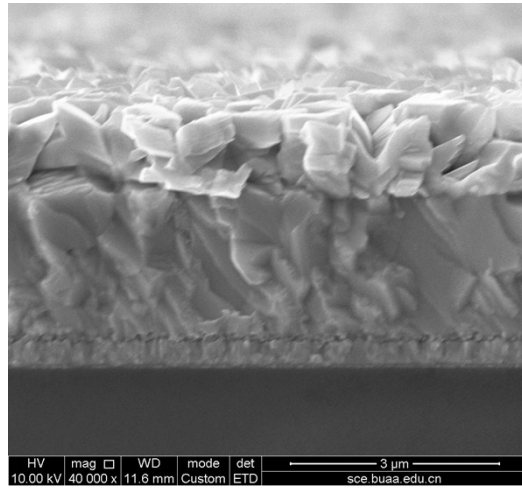

**Fig. S3** SEM cross-sectional image of the FTO/CdS/CdTe/Bi<sub>2</sub>Te<sub>3</sub> cell

**Tab. S1** The original data of  $\Delta T$  collected from the cool and hot side

| $T_{\text{cool}} (^{\circ}\text{C})$ | $T_{\text{hot}} (^{\circ}\text{C})$ | $\Delta T$ (K) |
|--------------------------------------|-------------------------------------|----------------|
| 23.8                                 | 76                                  | 52.2           |
| 24                                   | 79.5                                | 55.5           |
| 24.1                                 | 80.5                                | 56.4           |
| 24.2                                 | 81.7                                | 57.5           |
| 24.2                                 | 83.4                                | 59.2           |
| 24.3                                 | 84.5                                | 60.2           |
| 24.6                                 | 87.4                                | 62.8           |
